# Supplementary material for: NAVIGATE I: Randomized, Placebo-Controlled, Double-Blind Trial of the Exhalation Delivery System With Fluticasone for Chronic Rhinosinusitis With Nasal Polyps
Source: PubMed Central journal article supplement — Am J Rhinol Allergy. 2018 Nov 27;33(1):69–82. doi: 10.1177/1945892418810281 (PMC6604249; doi:10.1177/1945892418810281), 2018-11-27
Supplement: Supplemental_Material.pdf [file Supplemental_Material.pdf]

1 **APPENDICES**

2 ***Appendix 1. Principal Study Investigators***

3 The following principal investigators participated in the study:

4 **Canada**

5 Dr. Jaime Del Carpio: Jaime Del Carpio; CHUM Hôtel-Dieu: Martin Desrosiers; Gordon

6 Sussman Clinical Research Inc: Gordon Sussman; Ottawa Allergy Research Corporation:

7 William Yang

8 **Czech Republic**

9 ENT Department University Thomayer Hospital with Polyclinic: Pavel Chrbolka; VFN-

10 Department ENG: Radim Kana; Stredomoravska nemocnicna as – odstepeny zavod Nemocnice

11 Prostejov: Pavel Navratil; University Hospital Hradec Kralove, ORL: Victor Chrobok; Oblastni

12 nemocnice Kladno: Monika Plaskova; ENT Department Charles University Prague: Ales Hahn;

13 Alergologie Trebonska sro: Lenka Pennigrova

14 **South Africa**

15 Tiervlei Trail Centre: Maria Pretorius; JOSHA research : Johannes Jurgens Lombaard; Wits

16 Clinical Research: Alana Hemus; Phoenix Pharma: Daniel Rudolph Nalan; Randles Road

17 Medical Centre: Uttam Govind; M-Care Medical Centre: Mare Botha

18 **Ukraine**

19 Kyiv City Clinical Hospital #9: Bogdan Bil; Municipal Treatment and Prophylactic Institution:

20 Oleg Malyayev; Regional Clinical Hospital: Vyacheslav Vanchenko; Clinic of State Institution:

21 Dmytro Zabolotnyi; Municipal Healthcare Institution Regional Clinical Hospital Center of

22 Urgent Medical Care and Medicine of Catastrophes: Anatoliy Ahuralov

23 **United Kingdom**

24 Guys' Hospital: Claire Hopkins; Wrightington Hospital: Nirmal Kumar; Norwich and Norfolk  
25 University Hospital: John Phillips; Derriford Hospital: Hisham Khalil; Sheffield Teaching  
26 Hospital NHS Foundation Trust: Jaydip Ray; University College Hospital: Valerie Lund; James  
27 Paget University Hospital NHS Trust: Carl Philpott; Addenbrooke's Hospital: Shuaib Nasser;  
28 Hinchingbrooke Hospital: Jose Tavares

29 **United States**

30 California Medical Clinic for Headache: David Kudrow; Optimed Research, Ltd: Donald  
31 McNeil; Ear Nose & Throat Associates of Texas, PA: Neelesh Mehendale; Costal Ear, Nose and  
32 Throat, LLC: Mary Mitskavitch; Charlotte Eye Ear Nose and Throat Associates, PA: Jonathan J.  
33 Moss; University of Chicago: Robert Naclerio; Allergy Associates Research Center: Michael  
34 Noonan; Colorado ENT & Allergy: Lewis J. Romett; Cleveland Clinic: Raj Sindwani; New York  
35 Medical College: Catherine Small; Clinical Research Group of Montana, PLLC: Alan Wanderer;  
36 PMG Research of Wilmingot LLC: Gregory Zwack; PMG Research of Winston Salem: Ronald  
37 Shealy; Rush University Medical Center: James Moy; Kern Allergy and Medical Research, Inc.:  
38 Tonny Tanus; NEQ Baptist Clinic: Bryan Lansford; NU Feinberg School of Medicine: Rakesh  
39 Chandra; ENG & Allergy Associates, LLP: Richard DeMalo; Chicago ENT: Michael Friedman;  
40 Physicians Regional Medical Group: James Hadley; EVMS Department of Otolaryngology:  
41 Joseph Han; Vital Prospects Conical Research Institute: Iftikhar Hussain; ENT and Allergy  
42 Associates, LLP: Nagalingam Jeyalingam; The Center for Pharmaceutical Research, P.C.: John  
43 Ervin; ENTTEX: Lav Kapadia; Center California Clinical Research: Brent Lanier; University of  
44 South Florida: Richard Lockey; Allergy, Asthma & Sinus Center, S.C.: Gary Steven; Focus  
45 Conical Research: Joseph Kasper; Intermountain Ear Nose and Throat: Steven Miller; SC

46 Clinical Research, Inc.: James Gordon; TOSH Medical Towers: Justin Gull; Choc PSF, AMC,  
47 Division of AA & I: Sherwin Gillman; AARA Research Center: William Lumry; Northeast  
48 Medical Research Associates, Inc: David S. Miller; Colorado allergy and Asthma Centers, P.C.:  
49 Shaila Gogate; Peninsula Research Associates, Inc.: Lawrence Sher; Asthma & Allergy  
50 Associates, PC: Daniel Soteres; California Allergy & Asthma Medical Group, Inc: Sheldon  
51 Spector; Allergy, Asthma & Clinical Research Center: Martha Tarpay; Allergy & Asthma  
52 Specialists Medical Group: Steven Weinstein; National Allergy, Asthma & Urticaria Centers of  
53 Charleston, PA: Thomas Murphy; California Allergy and Asthma Palmdale: Ricardo Tan;  
54 Bensch Research Associates  
55

56 **Appendix 2. Detailed entry criteria**

- 57 1. Men or women 18 years of age and older.
- 58 2. Women had to:
- 59 • be practicing an effective method of birth control (eg, prescription oral contraceptives,  
60 contraceptive injections, contraceptive patch, intrauterine device, double-barrier method  
61 [eg, condoms, diaphragm, or cervical cap with spermicidal foam, cream, or gel], or male  
62 partner sterilization) before entry and throughout the study, or
  - 63 • be surgically sterile (have had a hysterectomy or bilateral oophorectomy, or tubal ligation  
64 at least 1 year before Visit 1 [screening]) or otherwise have been incapable of pregnancy,  
65 or
  - 66 • be postmenopausal (spontaneous amenorrhea for at least 1 year).
- 67 3. Women of child-bearing potential had to have a negative serum beta-human chorionic  
68 gonadotropin ( $\beta$ -hCG) pregnancy test at Visit 1 (screening).
- 69 4. Must have had bilateral nasal polyposis with a grade of 1 to 3 in each of the nasal cavities  
70 as determined by a nasal polyp grading scale score measured by nasoendoscopy at Visit 1  
71 (screening).
- 72 5. Must have had at least moderate symptoms of nasal congestion/obstruction as reported by  
73 the subject, on average, for the 7-day period preceding Visit 1 (screening).
- 74 6. At Visit 2, Day 1 (baseline), subjects must have had a morning score of at least  
75 2 (moderate) on nasal congestion/obstruction recorded on the subject diary for at least 5 of  
76 the last 7 days of the 7- to up to 14-day run-in phase.

- 77 7. Must have demonstrated an ability to correctly complete the daily diary during the run-in  
78 phase to be eligible for randomization.
- 79 8. Subjects with comorbid asthma or chronic obstructive pulmonary disease (COPD) must  
80 have been stable with no exacerbations (eg, no emergency room visits, hospitalization, or  
81 oral or parenteral steroid use) within the 3 months prior to Visit 1 (screening). Inhaled  
82 corticosteroid use must have been limited to stable doses of no more than 1000 µg/day of  
83 beclomethasone (or equivalent) for at least 3 months prior to Visit 1 (screening) with plans  
84 to continue use throughout the study.
- 85 9. Must have been able to cease treatment with intranasal medications including, but not  
86 limited to, intranasal steroids, intranasal sodium cromolyn, nasal atropine, nasal  
87 ipratropium bromide, and inhaled corticosteroids (except permitted doses listed above for  
88 comorbid asthma and COPD) at Visit 1 (screening).
- 89 10. Must have been able to cease treatment with oral and nasal decongestants and  
90 antihistamines at Visit 1 (screening).
- 91 11. Must have been able to use the OptiNose device correctly; all subjects were required to  
92 demonstrate correct use of the practice placebo at Visit 1 (screening).
- 93 12. Must have been capable, in the opinion of the investigator, of providing informed consent  
94 to participate in the study. Subjects must have signed an informed consent document  
95 indicating that they understood the purpose of and procedures required for the study and  
96 were willing to participate in the study.

97

98 **Appendix 3. Detailed exclusion criteria**

- 99 • Pregnancy/lactation.
- 100 • Complete or near-complete obstruction of the nasal cavities.
- 101 • Inability to achieve bilateral nasal airflow.
- 102 • Inability to have each nasal cavity examined.
- 103 • Nasal septum perforation.
- 104 • >1 episode of epistaxis with frank bleeding in the month prior to screening
- 105 • Evidence of significant mucosal injury, ulceration or erosion on screening nasal
- 106 examination/nasoendoscopy.
- 107 • History of >5 sinonasal surgeries for either nasal polyps or nasal/sinus inflammation
- 108 (lifetime).
- 109 • History of sinus or nasal surgery within 6 months prior to screening.
- 110 • History of any surgical procedure that prevented the accurate grading of polyps.
- 111 • Symptoms of seasonal allergic rhinitis at screening or baseline, and/or, based on time
- 112 of year, anticipated onset of symptoms within 4 weeks of randomization.
- 113 • Current, ongoing rhinitis medicamentosa.
- 114 • Significant oral structural abnormalities.
- 115 • Diagnosis of cystic fibrosis.
- 116 • History of Churg-Strauss syndrome or dyskinetic ciliary syndromes

- 117 • Purulent nasal infections, acute sinusitis, or upper respiratory tract infection within 2  
118 weeks prior to screening.
- 119 • Planned sinonasal surgery during the period of the study.
- 120 • Allergy, hypersensitivity, or contraindication to corticosteroids or steroids.
- 121 • Allergy or hypersensitivity to any excipients in the study drug.
- 122 • Exposure to any glucocorticoid treatment with potential for systemic effects within 1  
123 month prior to screening; except as noted in inclusion criteria for patients with  
124 comorbid asthma or COPD.
- 125 • Nasal candidiasis.
- 126 • Use of potent cytochrome P3A4 (CYP3A4) inhibitor within 14 days before screening.
- 127 • History or current diagnosis of any form of glaucoma or ocular hypertension.
- 128 • History of intraocular pressure elevation on any form of steroid therapy.
- 129 • Current diagnosis of the presence (in either eye) of a cataract of grade 1 or greater as  
130 defined on the eye examination worksheet or, less than a grade 1 cataract with  
131 associated visual impairment.
- 132 • Any serious or unstable concurrent disease, psychiatric disorder, or any significant  
133 condition that, in the opinion of the investigator, could confound the results of the  
134 study or could interfere with the subject's participation or compliance in the study.
- 135 • A recent (within 1 year of screening) clinically significant history of drug or alcohol  
136 use, abuse, or dependence that, in the opinion of the investigator could interfere with  
137 the subject's participation or compliance in the study.

- 138 • Positive urine drug screen at screening for drugs of abuse, with the exception of  
139 prescribed medications for legitimate medical conditions.
- 140 • Participation in an investigational drug clinical trial within 30 days of screening.
- 141 • Employees of the investigator or study center, with direct involvement in the  
142 proposed study or other studies under the direction of that investigator or study  
143 center, as well as family members of the employees or the investigator.
- 144
- 145



| Baseline characteristics by treatment group (Intent-to-Treat Population)          |                     |                   |                    |                    |                          |                    |
|-----------------------------------------------------------------------------------|---------------------|-------------------|--------------------|--------------------|--------------------------|--------------------|
| Variable Statistic                                                                | Placebo<br>(n = 82) | EDS-FLU           |                    |                    |                          | Total<br>(n = 323) |
|                                                                                   |                     | 93 µg<br>(n = 81) | 186 µg<br>(n = 80) | 372 µg<br>(n = 80) | All EDS-FLU<br>(n = 241) |                    |
| <b>Number of steroid nasal spray treatments for polyps in past 10 years n (%)</b> |                     |                   |                    |                    |                          |                    |
| 0                                                                                 | 5 (6.1)             | 4 (4.9)           | 4 (5.0)            | 5 (6.3)            | 13 (5.4)                 | 18 (5.6)           |
| 1                                                                                 | 23 (28.0)           | 35 (43.2)         | 31 (38.8)          | 23 (28.8)          | 89 (36.9)                | 112 (34.7)         |
| 2                                                                                 | 19 (23.2)           | 17 (21.0)         | 26 (32.5)          | 28 (35.0)          | 71 (29.5)                | 90 (27.9)          |
| 3                                                                                 | 15 (18.3)           | 10 (12.3)         | 11 (13.8)          | 12 (15.0)          | 33 (13.7)                | 48 (14.9)          |
| 4                                                                                 | 12 (14.6)           | 5 (6.2)           | 1 (1.3)            | 7 (8.8)            | 13 (5.4)                 | 25 (7.7)           |
| 5                                                                                 | 2 (2.4)             | 5 (6.2)           | 5 (6.3)            | 5 (6.3)            | 15 (6.2)                 | 17 (5.3)           |
| 6                                                                                 | 4 (4.9)             | 3 (3.7)           | 2 (2.5)            | 0                  | 5 (2.1)                  | 9 (2.8)            |
| 7                                                                                 | 2 (2.4)             | 1 (1.2)           | 0                  | 0                  | 1 (0.4)                  | 3 (0.9)            |
| 8                                                                                 | 0                   | 1 (1.2)           | 0                  | 0                  | 1 (0.4)                  | 1 (0.3)            |
| <b>Total polyp grading score</b>                                                  |                     |                   |                    |                    |                          |                    |
| N                                                                                 | 82                  | 81                | 80                 | 79                 | 240                      | 322                |
| Mean                                                                              | 3.8                 | 3.6               | 3.9                | 3.7                | 3.7                      | 3.7                |
| SD                                                                                | 0.94                | 1.07              | 1.08               | 0.94               | 1.04                     | 1.01               |
| Minimum, Maximum                                                                  | 2, 6                | 2, 6              | 2, 6               | 2, 6               | 2, 6                     | 2, 6               |
| <b>Worst polyp grading score</b>                                                  |                     |                   |                    |                    |                          |                    |
| N                                                                                 | 82                  | 81                | 80                 | 79                 | 240                      | 322                |
| Mean                                                                              | 2.1                 | 2.0               | 2.1                | 2.0                | 2.0                      | 2.1                |
| SD                                                                                | 0.58                | 0.57              | 0.60               | 0.48               | 0.55                     | 0.56               |
| Minimum, Maximum                                                                  | 1, 3                | 1, 3              | 1, 3               | 1, 3               | 1, 3                     | 1, 3               |
| <b>Distribution of participants by polyp grade</b>                                |                     |                   |                    |                    |                          |                    |
| Grade 1                                                                           | 37                  | 55                | 33                 | 38                 | 126                      | 163                |
| Grade 2                                                                           | 105                 | 88                | 100                | 106                | 294                      | 399                |
| Grade 3                                                                           | 22                  | 19                | 27                 | 14                 | 60                       | 82                 |

EDS-FLU = Exhalation Delivery System for Fluticasone; n = number of participants; n (%) = number (percentage) of participants; SD = standard deviation

148 **Appendix 5. Details of Missing Data**

149 Trial-wide, for the co-primary outcome of nasal congestion there were a total of 2 MAR values,  
150 both in the 93-mcg treatment group, and 8 NMAR values, 5 in the EDS-placebo and 1 in each of  
151 the three active treatment groups. For the co-primary outcome of polyp grade, there were 2, 3, 5,  
152 and 0 MAR values in the EDS-placebo, EDS-FLU 93 mcg, EDS-FLU 186 mcg, and EDS-FLU  
153 372 mcg treatment groups, respectively, for a total of 10 overall; there were 12, 3, 7, and 3 in the  
154 EDS-placebo, EDS-FLU 93 mcg, EDS-FLU 186 mcg, and EDS-FLU 372 mcg treatment groups,  
155 respectively, for a total of 25 overall NMAR.

156

157 **APPENDIX 6. FIG 1.** Mean change in reflective AM symptoms of congestion, facial pain and pressure, rhinorrhea,  
 158 and sense of smell at weeks 4, 8, 12, and 16.

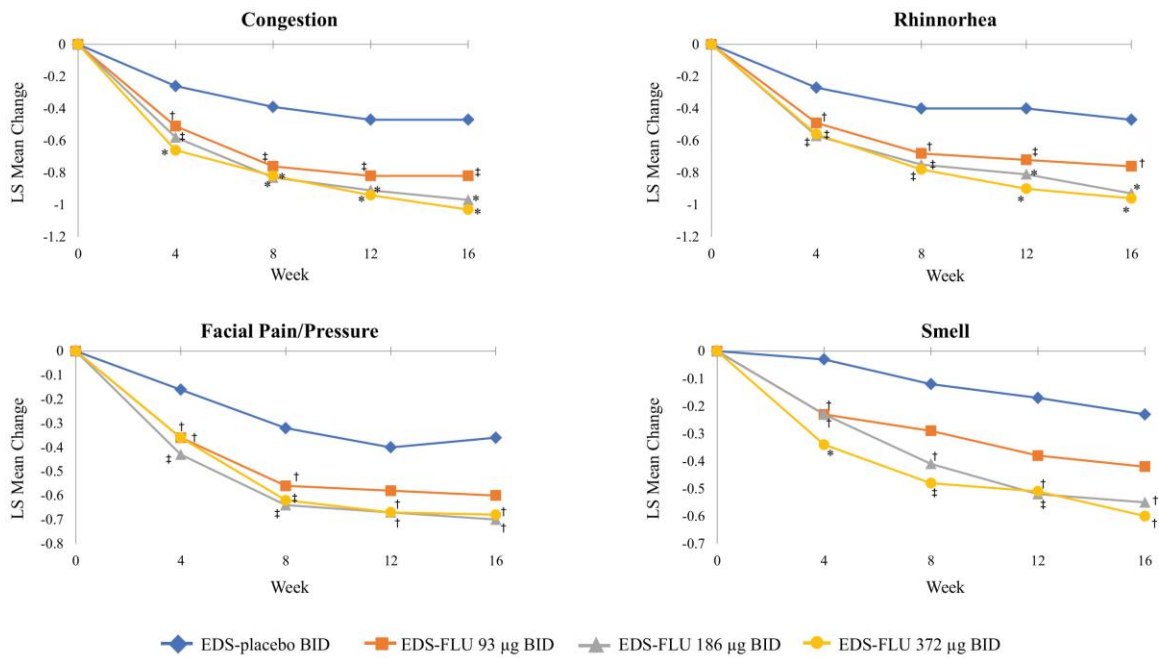

159  
 160 AM = morning; BID = twice daily; LS = least squares.

161 †  $P \leq .05$  vs EDS-placebo

162 ‡  $P \leq .01$  vs EDS-placebo

163 \*  $P \leq .001$  vs EDS-placebo

164

165

166

167

168

169

170

171

172

173 **APPENDIX 6. FIG 2.** Mean change in instantaneous PM symptoms of congestion, facial pain and pressure,  
 174 rhinorrhea, and sense of smell at weeks 4, 8, 12, and 16.

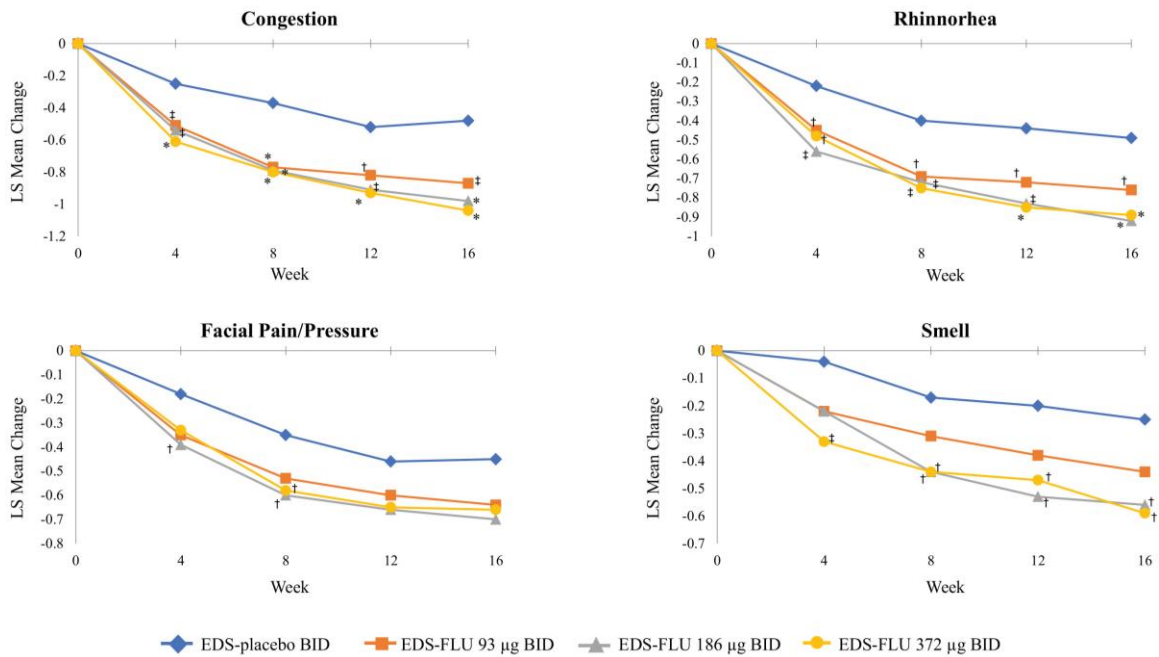

175  
 176 AM = morning; BID = twice daily; LS = least squares.

177 †  $P \leq .05$  vs EDS-placebo

178 ‡  $P \leq .01$  vs EDS-placebo

179 \*  $P \leq .001$  vs EDS-placebo

180

181

182

183

184

185

186

187

188 **APPENDIX 6. FIG 3.** Mean change in reflective PM symptoms of congestion, facial pain and pressure, rhinorrhea,  
 189 and sense of smell at weeks 4, 8, 12, and 16.

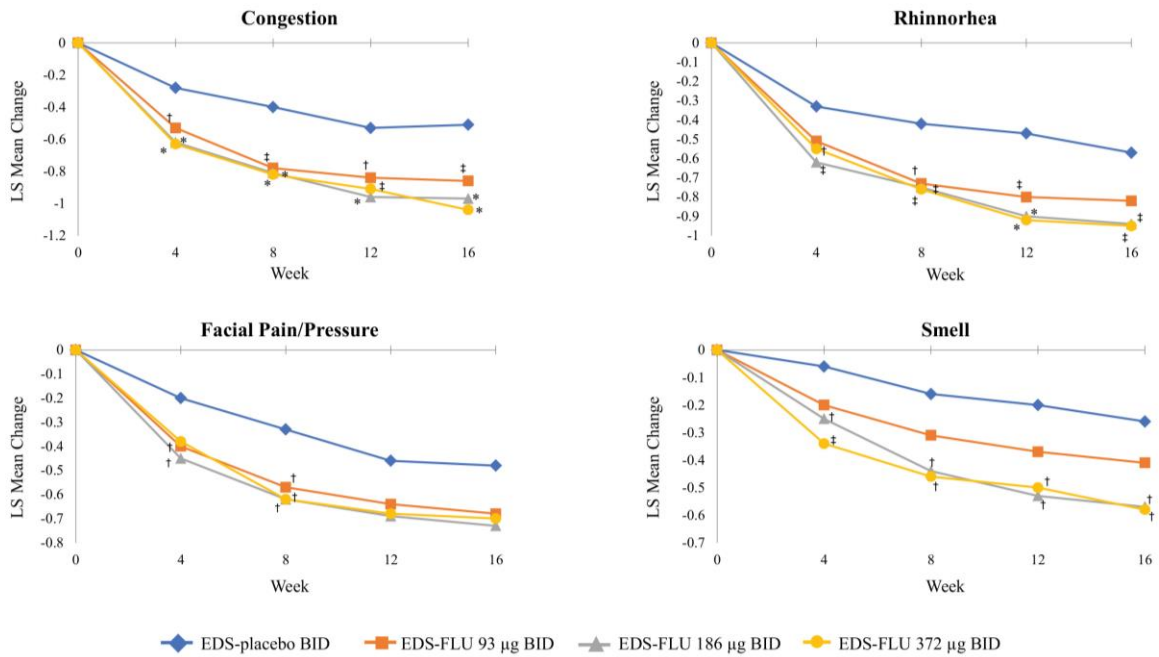

190

191 AM = morning; BID = twice daily; LS = least squares.

192 †  $P \leq .05$  vs EDS-placebo

193 ‡  $P \leq .01$  vs EDS-placebo

194 \*  $P \leq .001$  vs EDS-placebo

195
